# Supplementary material
Source: MDPI journal article supplement (https://www.mdpi.com/2673-8112/1/1/9)
Supplement: s1 [file s1]

| <b>protein</b> | <b>virus</b> | <b>NCBI reference</b> | <b>aa number</b> | <b>% of identity</b> |
|----------------|--------------|-----------------------|------------------|----------------------|
| nucleocapsid   | SARS-CoV-2   | YP_009724397.2        | 419              | 100.00               |
| nucleocapsid   | SARS-CoV     | AYV99827.1            | 422              | 89.74                |
| nucleocapsid   | HC OC43      | YP_009555245.1        | 448              | 33.74                |
| nucleocapsid   | HUK1         | ARU07581.1            | 441              | 33.59                |
| nucleocapsid   | HC NL63      | ABI20791.1            | 377              | 29.25                |
| nucleocapsid   | HC E229      | AGW80953.1            | 389              | 28.10                |

**Supplementary Table S1.** N-protein percentage of identity (% of identity) among human corona viruses. Identity was calculated using Clustal Omega at <https://www.ebi.ac.uk/Tools/msa/clustalo/> feeding the server with the indicated NCBI reference sequences.

|                |                                                                 |     |
|----------------|-----------------------------------------------------------------|-----|
| ABI20791.1     | -----MANVNWADDRAA-----R-----                                    | 15  |
| AGW80953.1     | -----MATVKWADASEPQR-----GR-----                                 | 18  |
| YP_009724397.2 | MSD-NGPQ-NQR-----NAPRI TFGGSDSTGNSQNGERS----                    | 46  |
| AYV99827.1     | MSD-NGPQSNQR-----SAPRI TFGGPTDSTDNNQNGGRN----                   | 47  |
| YP_009555245.1 | MSF TPGKQSSSRASSGNRSGNG-ILKWADQSDQFRNVQTRGRRAQPKQTATSQQPSGGNV   | 59  |
| ARU07581.1     | MSYTPGHYAGSRSSSGNRSGILKKT\$WADQSERNYQT FNRGRKTQPKFTVST--QPQGN   | 58  |
|                | ... *                                                           |     |
| ABI20791.1     | FPPPSFYMPLLVSSDKAPYRVI PRNLVPIGKGN-KDEQIGYWNVQE--RWRMRGRQVRDL   | 72  |
| AGW80953.1     | RIPYSLYSPLLVDS-EQPKWVI PRNLVPI NKKD-KNKLIGYWNVQK--RFRTKGRKRVDL  | 74  |
| YP_009724397.2 | NNTASWFTAL TQHGK-EDLK FPRGQGVPI NTNSSPDDQIGYYRRAT-RRIRGGDGKMKDL | 104 |
| AYV99827.1     | NNTASWFTAL TQHGK-EELRFPRGQGVPI NTNSGPDQIGYYRRAT-RRVRGGDGKMKEL   | 105 |
| YP_009555245.1 | VPYYSWFSGITQFQKGKEFEFVEGQGVPIAPGVPATEAKGYWYRHNRRSFKTADGNQRQL    | 119 |
| ARU07581.1     | IPHYSWFSGITQFQKGRDFKFSDGQGVPIAFGVPPSEAKGYWYRHSRFSFKTADGQQKQL    | 118 |
|                | * : : .. : *** . ** : : * : *                                   |     |
| ABI20791.1     | PPKVHFYLLGTGPHKDLKFRQRSDGVVWAKEGAKTVNTS-LGNRKRQKPLEPKFSIAL      | 131 |
| AGW80953.1     | SPKLHFYLLGTGPHKDAKFRERVEGVVWAVDGAKEPTG-YGVRRKNSEPEIPHFNQKL      | 133 |
| YP_009724397.2 | SPRWYFYLLGTGPEAGLPYGANKDGIWVATEGALNTPKDHIGTRNPANNAIIV---LQL     | 161 |
| AYV99827.1     | SPRWYFYLLGTGPEASLPYGANKEGIVWATEGALNTPKDHIGTRNPANNAATV---LQL     | 162 |
| YP_009555245.1 | LPRWYFYLLGTGPHAKDQYGTIDGVVWVASNQADVNTPADIVDRDPSSDEAIP---TRF     | 176 |
| ARU07581.1     | LPRWYFYLLGTGPYANASYGESLEGVFWANHQADTSTPSDVSSRDPTTQEAIP---TRF     | 175 |
|                | * : : ***** : : * : *** . * . : :                               |     |
| ABI20791.1     | PPELSVE--FEDRSNNSSRASSRSSTR--NNSRDSRSTSRQQSRTSDSNQSSSDLVA       | 187 |
| AGW80953.1     | PNGVTVVE--EPDSRA----PSRSQSR--SQSRGRGESK PQSRNPSSDRNHNSQDDIMK    | 184 |
| YP_009724397.2 | PQGTTLPKGFYAEGSRGGSQASSRSSRSRNSRNS---TPGS-SRGTS PARMAGNG---     | 214 |
| AYV99827.1     | PQGTTL PKGFYAEGSRGGSQASSRSSRSRGNRNS---TPGS-SRGNS PARMASGG---    | 215 |
| YP_009555245.1 | PPGTVL PQGYIEGSGRSAPN-SRSTSR--TSSRAS--SAGSRSRANSGNRTPTSGVTP     | 230 |
| ARU07581.1     | PPGTIL PQGYVEGSGRSASN-SRPGSR--SQSRGP--NNRSLSRNSNFRHSDSIVKP      | 229 |
|                | * : : : ** : * . ** . . . . .                                   |     |
| ABI20791.1     | AVTLALKNLGFDNQSKSPSS--GTSTPKKPNKPL-----SQPRADKPSQL              | 231 |
| AGW80953.1     | AVAAALKS LGFDK PQEKDKKSAKTGT PKPSRNQSPASSQTSAKSLARSQSSE TKEQKH  | 244 |
| YP_009724397.2 | -GDAAALALLDLRLNQLESKMSGKQQQQ-----GQTVTKKSAEAS                   | 255 |
| AYV99827.1     | -GETALALLDLRLNQLESKVSGKQQQQ-----GQTVTKKSAEAS                    | 256 |
| YP_009555245.1 | DMADQIASLV LAKLGKDATK-----PQQV-----TKHTAKEVRQKIL                | 267 |
| ARU07581.1     | DMADEIANLV LAKLGKE-SK-----PQQV-----TKQNAKEIRHKIL                | 265 |
|                | : * : . : ..                                                    |     |
| ABI20791.1     | KKPRWKRVPTRE--ENVIQCFGPRDFNH--NMGSDSLVQNGVDAGFPQLAELIPNQAA      | 286 |
| AGW80953.1     | KKPRWKRPNDVTSNVTQCFGPRDLDH--NFGSAGVVANGVKAGYQFAELVPS TAA        | 301 |
| YP_009724397.2 | KKPRQKRTATKA--YNV TQAFGRRGPEQTQGNFGDQELIRQGT DYKHWPQIAQFAPSASA  | 313 |
| AYV99827.1     | KKPRQKRTATKQ--YNV TQAFGRRGPEQTQGNFGDQELIRQGT DYKHWPQIAQFAPSASA  | 314 |
| YP_009555245.1 | NKPRQKRSPNKQ--CTVQQCFGKRGPNQ--NFGGGEMLKLGTS DPQFPILAELAPTAGA    | 322 |
| ARU07581.1     | TKPRQKRTPNKH--CNVQQCFGKRGPSQ--NFGNAEMLKLG TNDPQFPILAELAPTPGA    | 320 |
|                | *** ** . , * * , * * , . : * , * . : : * , . : * : : * , . *    |     |
| ABI20791.1     | LLFDSEVSTDEVG-----DNVQITYTYKMLVAKDNKNLPKF----IEQISAF TK         | 331 |
| AGW80953.1     | MLFDSHIVSKESG-----NTVVLFTTRVTVSKDHPHLGKF----LEELNAFTR           | 346 |
| YP_009724397.2 | FFGMSRIGMEVTP-----SGTWLTYTGAIKLDDKDPNFKDQVILLNKHIDAYKT          | 362 |
| AYV99827.1     | FFGMSRIGMEVTP-----SGTWLTYHGAIKLDDKDPQFQDNVILLNKHIDAYKT          | 363 |
| YP_009555245.1 | FFFGSRLE LAKVQNLSGNPDEPQKDVYELRYNGAIRFDSTLSGFETIMKVLNENLNAYQQ   | 382 |
| ARU07581.1     | FFFGSKLELVKRE---SEADSPVKDVFELRYSGSIRFDSTLPGFETIMKVLKENLDAYVN    | 377 |
|                | : : * : . : : : : : : : : : : *                                 |     |
| ABI20791.1     | PSSIKEMQSQSS--HVVQNT-----VLNA-----SI-PESKPLADDDSAIIEIVNEVLH     | 377 |
| AGW80953.1     | EMQQHPLL NPSA--LEFNP-----SQT-----SP-ATAEPVRDEVSIETDIDEVN-       | 389 |
| YP_009724397.2 | FPPTEPKDKKKKDADETQALPQRQKQQT-----VTLLPAADLDDFSKQLQ-----         | 408 |
| AYV99827.1     | FPPTEPKDKKKKTDEAQPLPQRQKQQT-----VTLLPAADMDDFSRQLQ-----          | 409 |
| YP_009555245.1 | QDG---M-----MNMSPKPQRQRGHKNGQGENDNISVAVPKSRVQQNKSRELTAEDIS      | 432 |
| ARU07581.1     | SNQNTVS-----GSLSPKPQRKRGVKQSPLEFDSLNLN----ADTQHISNDFTPEDHS      | 426 |
|                | . : :                                                           |     |
| ABI20791.1     | -----                                                           | 377 |
| AGW80953.1     | -----                                                           | 389 |

**Supplementary Figure S1.** Nucleocapsid homology among SARS-Cov-2 and HCoV-NL63, HCoV-229E, HCoV-OC43, HCoV-HKU1. Amino acids identical are marked by\*. Amino acid numbering is shown on the right, NCBI Reference Sequence number is indicated at the left. ABI20791.1 indicates HCoV-NL63, AGW80953.1 represents HCoV-229E, YP\_009724397.2 represents SARS-Cov-2, represents SARS-CoV, YP\_009555245.1 represents HCoV-OC43, ARU07581.1 represents HCoV-HKU1.

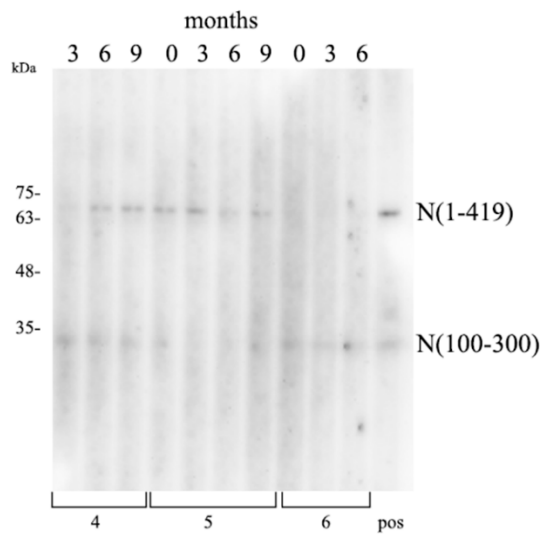

**Supplementary Figure S2.** Multiple slot immunoblotting against the N protein variants N(1-419) and N(100-300) in participants categorized as borderline positive by ELISA. Sera (diluted 1/100) from 3 donors at different time points (0, 3, 6 and 9 months) and a positive control were loaded into each slot. At the top of the blot is the time point of sample collection. The N protein variant is shown on the right and the numbers at the bottom indicate the individual donors.
